# Supplementary material for: Exome sequencing reveals aberrant signalling pathways as hallmark of treatment-naive anal squamous cell carcinoma
Source: PubMed Central journal article supplement (PMC5787481; doi:10.18632/oncotarget.23066), 2017-12-08
Supplement: oncotarget-09-464-s001.pdf [file oncotarget-09-464-s001.pdf]

## Exome sequencing reveals aberrant signalling pathways as hallmark of treatment-naive anal squamous cell carcinoma

### SUPPLEMENTARY MATERIALS

#### Tumour 16

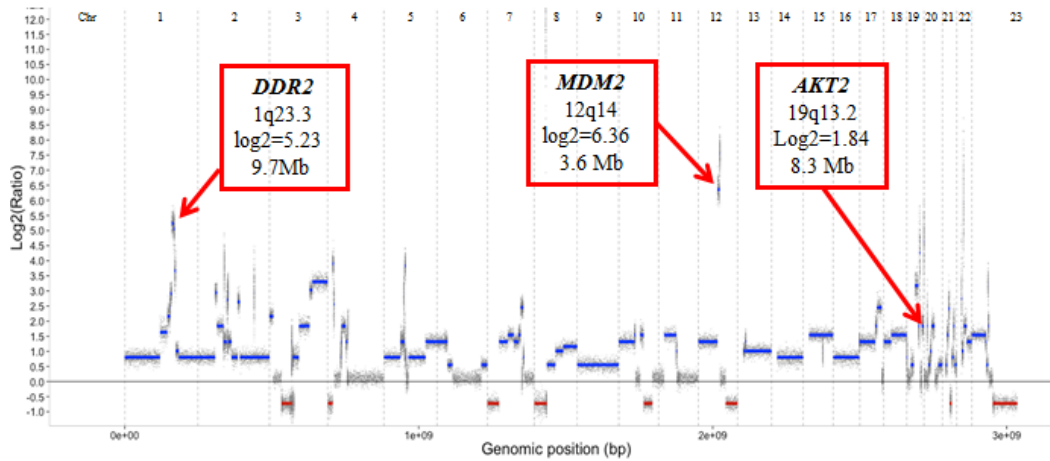

#### Tumour 8

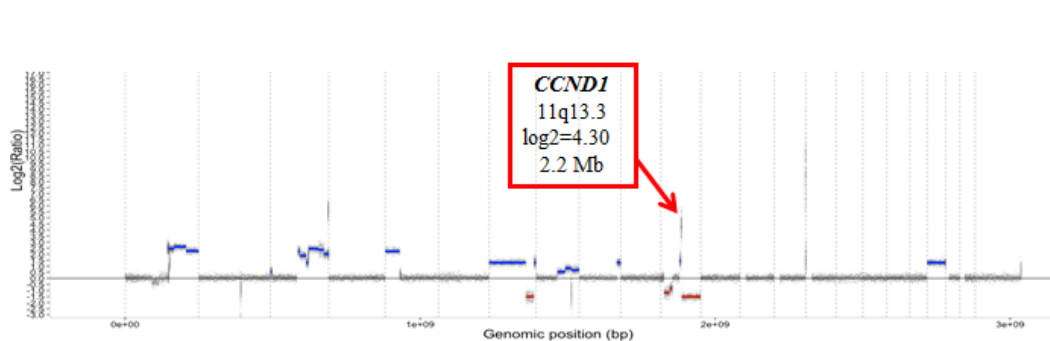

Supplementary Figure 1: Validation of focal amplifications (size < 10 Mb) using array comparative genomic hybridization.

**Supplementary Table 1: Frequencies of inactivating mutations of *FAT1* and *TRIP12* in various other common cancers as compared to ASCC\***

| <b>Cancers</b>       | <b><i>FAT1</i> % of altered tumours</b> | <b><i>TRIP12</i> % of altered tumours</b> |
|----------------------|-----------------------------------------|-------------------------------------------|
| ASCC (present study) | <b>15 (3/20)</b>                        | <b>15 (3/20)</b>                          |
| BRCA                 | 1.2 (6/507)                             | 0.6 (3/507)                               |
| LUAD                 | 11 (25/230)                             | 3 (7/230)                                 |
| LUSC                 | 15 (25/178)                             | 6 (11/178)                                |
| UCEC                 | 16 (40/248)                             | 6 (16/248)                                |
| GBM                  | 1 (3/291)                               | 0.3 (1/291)                               |
| HNSC                 | 23 (64/279)                             | 2.5 (7/279)                               |
| COAD                 | 6 (13/224)                              | 5 (12/224)                                |
| BLCA                 | 12 (15/130)                             | 4 (5/130)                                 |
| KIRC                 | 1.7 (7/424)                             | 0.7 (3/424)                               |
| OV                   | 3 (11/316)                              | 1.3 (4/316)                               |
| CESC                 | 5 (10/194)                              | 3 (6/194)                                 |

\*frequencies obtained from <http://www.cbioportal.org>

(ASCC) anal squamous cell carcinoma, (BRCA) breast adenocarcinoma, (LUAD) lung adenocarcinoma, (LUSC) lung squamous cell carcinoma, (UCEC) uterine corpus endometrial carcinoma, (GBM) glioblastoma multiforme, (HNSC) head and neck squamous cell carcinoma, (COAD) colon carcinoma, (BLCA) bladder urothelial carcinoma, (KIRC) kidney renal clear cell carcinoma, (OV) ovarian serous carcinoma, and (CESC) cervical squamous cell carcinoma.

**Supplementary Table 2: Focal gained and deleted chromosomal regions in the series of 20 ASCCs**

| Chromosomal location | Genomic location    | Size (Mb) | % of altered tumours | Relevant genes*                                          |
|----------------------|---------------------|-----------|----------------------|----------------------------------------------------------|
| <b>Gain</b>          |                     |           |                      |                                                          |
| 1p                   | 900506–3774138      | 2,8       | 55 (11/20)           | <i>HES5, SIK</i>                                         |
| 3q                   | 169643862–197432063 | 27,8      | 90 (18/20)           | <i>PIK3CA, TP63, TBL1XR1, FXR1, EIF4G1, EIF4A2, DLG1</i> |
| 5p                   | 678063–24509643     | 23,8      | 40 (8/20)            | <i>TERT, CTNND2</i>                                      |
| 8q                   | 129021180–146076708 | 17        | 55 (11/20)           | <i>MYC, NDRG1</i>                                        |
| 16p                  | 4016677–33961370    | 29,9      | 40 (8/20)            | <i>FUS, MYH11, TAOK2, CIITA</i>                          |
| <b>Deletion</b>      |                     |           |                      |                                                          |
| 2q                   | 209007560–233757697 | 24,7      | 35 (7/20)            | <i>TRIP12, ATIC, FNI, EPHA4, ACSL3, CUL3</i>             |
| 3p                   | 21462755–73523768   | 52        | 45 (9/20)            | <i>SETD2, FHIT, BAP1, MLH1, PBRM1, TGFBR2, CTNNB1</i>    |
| 4p                   | 155625–31116375     | 30,9      | 45 (9/20)            | <i>WHSC1, DHX15</i>                                      |
| 4q                   | 142557749–191003549 | 48,4      | 40 (8/20)            | <i>FBXW7, FAT1, IRF2, FRG1</i>                           |
| 10q                  | 87379812–91352966   | 3,9       | 45 (9/20)            | <i>PTEN</i>                                              |
| 11q                  | 82644905–134202036  | 51,5      | 80 (16/20)           | <i>ATM, MED17, CASP1, KMT2A, HSPA8, ACAD8</i>            |
| 13q                  | 36383265–51603768   | 15,2      | 40 (8/20)            | <i>RB1</i>                                               |
| 16q                  | 47347781–70711843   | 23,4      | 45 (9/20)            | <i>CYLD, CDH1, CHD9, NUP93, CNOT1, CBFB, CTCF</i>        |

\*relevant genes using the IntOGen database<sup>22</sup>
